1        Prevalence of female athlete triad (FAT) in rhythmic  
2        gymnastics, an aesthetic sport, and its association with  
3        risks of body-image distortion and eating disorders

4  
5        Short title: FAT prevalence and association with body-image distortion and eating  
6        disorders in rhythmic gymnasts

7  
8        Kayo Yoshitani-Kuwabara<sup>1\*</sup>¶, Yukina Yumen<sup>1</sup>¶, Yumi Takayama<sup>1</sup>, Natsuho Kitayama<sup>2</sup>,  
9        Fumiaki Hanzawa<sup>1,2</sup>, Naoki Sakane<sup>3</sup>, Narumi Nagai<sup>1,2</sup>

10  
11        <sup>1</sup> Laboratory of Nutritional Physiology, Graduate School of Human Science and  
12        Environment, University of Hyogo, Hyogo, 670-0092, Japan

13        <sup>2</sup>Department of Food Science and Nutrition, School of Human Science and Environment,  
14        University of Hyogo, Hyogo, 670-0092, Japan

15        <sup>3</sup> Division of Preventive Medicine, Clinical Research Institute for Endocrine and  
16        Metabolic Disease, National Hospital Organization, Kyoto Medical Center, Kyoto, 612-  
17        0861, Japan

18  
19        \*Corresponding author

20        E-mail: [yoshitanikayo@gmail.com](mailto:yoshitanikayo@gmail.com) (KY-K)

21 ¶These authors contributed equally to this work.

22

## 23 **Abstract**

24 **Background:** Female athlete triad (FAT), a syndrome linking low energy availability  
25 (LEA), menstrual dysfunction (MD), and impaired bone health, has serious potential  
26 consequences for sports performance and health. In this cross-sectional study, we  
27 investigated prevalences of each FAT component in female athletes of aesthetic and non-  
28 aesthetic sports and in non-athlete females, and its association with body image (BI)  
29 distortion and eating behaviors. **Methods:** Google Forms was used to examine self-  
30 reported height and weight, menstruation conditions, history of stress fractures (HSF), BI,  
31 the Eating Attitude Test (EAT)-26 (indicator of eating disorder) scores, and eating  
32 behaviors; these attributes were compared between 3 groups (athletes of aesthetic sports  
33 [rhythmic gymnasts,  $n=40$ ] and non-esthetic sports [volleyball players,  $n=46$ ]; other  
34 females of the same age group [non-athletes,  $n=108$ ]). To identify risk factors for each  
35 FAT component, multivariate logistic-regression analyses were used. LEA, MD, and HSF  
36 were dependent variables; rhythmic gymnasts, distorted BI, and EAT-26 scores were  
37 independent variables. **Results:** Rhythmic gymnasts had a lower body mass index  
38 ( $p<0.001$ ), higher LEA and MD prevalence (both  $p<0.001$ ), and greater percentage of  
39 participants with  $\geq 2$  FAT criteria ( $p<0.05$ ) compared with other groups; exhibited higher  
40 distorted BI scores ( $p<0.05$ ) than volleyball players; and tended to overestimate their  
41 body shape. Regarding eating behaviors, rhythmic gymnasts had higher EAT-26 scores  
42 ( $p<0.001$ ) than other groups and significantly tended to skip breakfast ( $p<0.05$ ) than non-  
43 athletes. Multivariate logistic-regression analysis revealed that rhythmic gymnasts and

44 body-shape overestimation were independently associated with LEA; rhythmic gymnasts  
45 and high EAT-26 scores were independently associated with MD. **Conclusions:** FAT  
46 prevalence was approximately 1.5 times higher among rhythmic gymnasts than among  
47 volleyball players and non-athletes. These findings suggest that rhythmic gymnasts are at  
48 a higher risk of FAT and being an athlete in aesthetic sports, body-shape overestimation,  
49 and higher EAT-26 scores are risk factors for FAT.

50

## 51 **Introduction**

52 An increasing number of women are engaging in sports from a young age [1].  
53 However, long-term rigorous training and weight loss to enhance athletic performance  
54 may predispose young women to the risk of developing female athlete triad (FAT) [2,3].  
55 This term encompasses a range of health-related issues relating to low energy availability  
56 (LEA) resulting from an energy deficit when reaching a certain threshold level, leading  
57 to menstrual dysfunction (MD) and low bone mineral density as a result of reduced bone  
58 formation associated with menstrual irregularities during adolescence [2]. LEA is  
59 characterized as increased energy expenditure owing to intense training alongside an  
60 insufficient energy intake [3].

61 The prevalence of FAT varies with sport characteristics and is notably high in  
62 aesthetic sports such as rhythmic gymnastics and figure skating [2]. We therefore focused  
63 on female rhythmic gymnasts, a group with approximately 10,000 participants in Japan,  
64 who often continue their competitive careers from elementary school through to high  
65 school and university during their growth period [4]. One study involving Japanese  
66 female elite athletes [5] reported that the rate of amenorrhea among female rhythmic

67 gymnasts was significantly higher at 40.9%, when compared with 6.2% and 3.8% in  
68 volleyball and soccer players, respectively. Moreover, the prevalence of stress fractures  
69 was higher among rhythmic gymnasts at 45.5%, when compared with 16.0% and 7.5%  
70 in volleyball and soccer players, respectively.

71 Rhythmic gymnastics is a sport where being physically thin has both competitive  
72 and aesthetic value. Athletes in this discipline have been known to often restrict their diets  
73 to enhance performance [6], leading to a higher prevalence of LEA and resulting in  
74 amenorrhea and stress fractures. To protect these athletes, it is crucial to recognize and  
75 address FAT-related signs early. In previous research, we showed that the desire to lose  
76 weight is linked to a distorted body image (BI) perception among Japanese non-athlete  
77 women [7]. This distorted perception may also cause rhythmic gymnasts to pursue  
78 excessive thinness, worsening the issues in relation to FAT. Investigating the association  
79 between a desire to lose weight and BI in rhythmic gymnasts could help address this issue.  
80 To better understand BI and the eating behaviors of rhythmic gymnasts, we compared  
81 such gymnasts with female athletes of non-aesthetic sports and with non-athletes. The  
82 most appropriate age group for this comparison involves female high school and  
83 university students, as their menstrual cycles are stabilized and their growth and  
84 development are nearing completion.

85 This study aimed to elucidate the characteristics and prevalence of FAT and BI,  
86 eating behaviors, and tendencies toward eating disorder in female rhythmic gymnasts in  
87 high school or at university in comparison with female volleyball players and non-athletes  
88 of similar age. We investigated the prevalence of each FAT component female athletes  
89 of aesthetic and non-esthetic sports and non-athlete females, and its association with  
90 distortion and eating behaviors.

91

## 92 **Methods**

### 93 **Study design and population**

94           This cross-sectional study was conducted using a web-based survey. Participants  
95 included female high school and university students engaged in aesthetic sports (rhythmic  
96 gymnasts,  $n=40$ ), non-aesthetic sports (volleyball players,  $n=46$ ), and non-athlete female  
97 students of the same age ( $n=108$ ). Rhythmic gymnasts were recruited between 15 April  
98 and 1 June 2022, while female volleyball players and non-athletes were recruited between  
99 15 June and 16 July 2023 through flyers requesting participation.

100           The rhythmic gymnasts and volleyball players participating in this study  
101 performed at a highly competitive level, capable of competing in prefectural and national  
102 tournaments, practicing their sports almost daily, and engaging in high-intensity exercise.  
103 Inclusion criteria comprised women who belonged to high-school or university rhythmic  
104 gymnastics or volleyball club, who agreed to participate in the study, and who could  
105 complete the questionnaire in Japanese.

106           Non-athlete women included high school students who visited our university's  
107 open campus and university students from our university and other nearby universities in  
108 Hyogo Prefecture or surrounding prefectures. Exclusion criteria were men, university or  
109 vocational school students majoring in nutrition, and non-athlete women with exercise  
110 habits. The study's purpose, its anonymity, the voluntary nature of participation, and the  
111 condition that completing the web survey would be considered consent to participate in  
112 the study were stated in the flyers and at the beginning of the web survey. This  
113 information was also explained verbally when distributing the flyers. Written informed

114 consent was obtained from the study participants. Data from all respondents who  
115 completed the web survey were used for analysis after confirming there were no errors,  
116 resulting in a 100% valid response rate.

117 This study was approved by the Research Ethics Committee of the University of  
118 Hyogo (No. 275, March 10, 2022, No. 314, June 7, 2023). The study procedures were  
119 conducted in accordance with the Declaration of Helsinki.

120

## 121 **Questionnaire**

122 We developed a self-report questionnaire using Google Forms. Study  
123 participants accessed the questionnaire via a flyer with a QR code link. The survey items  
124 sought data in relation to basic characteristics, The prevalence of each FAT component,  
125 BI, and eating behaviors.

126

## 127 **Basic characteristics**

128 Participants self-reported their school category, age (years), athletic experience  
129 (years), height (cm), and weight (kg). Body mass index (BMI) ( $\text{kg}/\text{m}^2$ ) was calculated as  
130 weight (kg) divided by height squared ( $\text{m}^2$ ).

131

## 132 **FAT**

133 LEA was screened using the definition of the American College of Sports  
134 Medicine [8], which considers clear signs of low energy status to be a body weight <85%  
135 of normal ( $\text{BMI}=22 \text{ kg}/\text{m}^2$ ).

136 Menstrual abnormalities were determined according to Obstetrics and

137 Gynecology Clinical Practice Guidelines, Outpatient Gynecology Edition, 2020 [9].  
138 Participants reported their current menstrual status either as: (i) a regular menstrual cycle,  
139 (ii) oligomenorrhea (cycle of  $\geq 39$  days), (iii) frequent menstruation (cycle of  $\leq 24$  days),  
140 (iv) amenorrhea (absence of menstruation  $\geq 3$  months), (v) irregular, or (vi) no menarche.  
141 Responses ranging from (ii) to (vi) were categorized as menstrual abnormalities.  
142 Participants who responded ‘yes’ to having a past experience of a stress fracture (response  
143 options: yes/no/don’t know) were considered to have had an HSF.

144

### 145 **BI-related indicators**

146 BI was assessed using the Japanese version of the body image scale (J-BIS)  
147 developed and examined for reliability and validity [10], which comprises 10 female  
148 silhouettes. Participants selected the silhouette they considered best represented their  
149 current-BI (C-BI) and their ideal-BI (I-BI). Using the BMI range (mean $\pm$ standard error)  
150 of each silhouette from a previous study [10], the silhouette number corresponding to a  
151 participant's BMI was defined as the actual-BI (A-BI). The difference between the C-BI  
152 and A-BI was defined as ‘BI distortion’ (BI distortion: overestimation if  $>0$ ,  
153 underestimation if  $<0$ ) [11,12].

154 The survey also included items on weight control behavior based on BI, such as the  
155 frequency of weighing ( $\geq 5$  times per week, 3–4 times per week, 1–2 times per week, or  
156 never) and weight loss experience (currently attempting to lose weight, not currently but  
157 have attempted to lose weight in the past, or neither currently nor in the past).

158

### 159 **Eating behaviors**

160 EDs were assessed using the eating attitudes test (EAT-26), a validated screening  
161 tool [13,14] for abnormal eating behaviors [15,16]. This test consists of 26 questions rated  
162 on a six-point Likert scale ranging from 0 to 3 (3, always; 2, almost always; 1, frequently;  
163 0, rarely, almost never, or never). Results were analyzed using reverse scoring, with a  
164 global score of >20 indicating high risk of an ED.

165 Additional items included self-evaluation of food intake (response options:  
166 consistent with consumption, more than consumption, less than consumption, and don't  
167 know), the frequency of skipping breakfast  $\geq 3$  times a week (yes/no), and eating dinner  
168  $\geq 2$  h before bedtime  $\geq 3$  times a week (yes/no). Respondents also reported the frequency  
169 of staple food intake, specifying how many times per week they consumed rice (1 bowl  
170 per serving), bread (1 slice of a 6-slice loaf per serving), and noodles (1 bowl or 1 plate  
171 per serving).

172

## 173 **Sample size**

174 The sample size was calculated using the "pwr" R package, as no previous studies were  
175 available to determine the effect size. Thus, the following parameters were used: number  
176 of groups = 3, alpha = 0.05, power = 0.8, and effect size = 0.4 (considered large). Based  
177 on these inputs, 22 participants per group were required, resulting in a total of 66  
178 participants.

179

## 180 **Statistical analysis**

181 All analyses were conducted using IBM SPSS Statistics version 28.0 for  
182 Microsoft Windows (IBM, Tokyo) software. Normality was assessed using a Shapiro-



183 Wilk test prior to performing statistical analyses. Group comparisons were undertaken  
184 using one-way analysis of variance (ANOVA) and a Kruskal-Wallis test, with Bonferroni  
185 correction applied in the test thereafter. Chi-square tests were used to examine differences  
186 between categorical variables. In logistic regression analysis, the dependent variable was  
187 FAT (LEA, MD, and HSF; applicable=1, not applicable=0). The explanatory variables  
188 included aesthetics (rhythmic gymnastics), which showed the highest FAT prevalence in  
189 the three-group comparison, EDs (previously reported to be associated with FAT), and  
190 BI distortion (a key research objective). Non-collinearity of the explanatory variables was  
191 confirmed using Spearman's correlation coefficients (all <0.3) and collinearity statistics  
192 (variance inflation factor, <10). For comparisons between rhythmic gymnasts and  
193 volleyball groups, age and athletic experience were adjusted as potential confounding  
194 factors. For comparisons between rhythmic gymnasts and non-athlete groups, only age  
195 was adjusted. The significance level was set at <5% (two-sided test).

196

## 197 **Results**

### 198 **Participant characteristics**

199 Table 1 summarizes the basic characteristics of the female rhythmic gymnasts,  
200 volleyball players, and non-athletes. No significant differences were observed in school  
201 type, age, or athletic history among the groups. The rhythmic gymnasts were significantly  
202 shorter than the volleyball players ( $p<0.05$ ) and had a notably lower mean weight  
203 (rhythmic gymnasts [ $46.3 \pm 4.6$  kg] vs. volleyball players [ $60.8 \pm 5.9$  kg] vs. non-athletes  
204 [ $49.8 \pm 6.7$  kg]), and BMI (rhythmic gymnasts [ $18.7 \pm 1.7$  kg/m<sup>2</sup>] vs. volleyball players  
205 [ $21.0 \pm 1.4$  kg/m<sup>2</sup>] vs. non-athletes [ $19.9 \pm 2.4$  kg/m<sup>2</sup>]) ( $p<0.001$ ).

206

207 **Table 1. Participant characteristics**

|                                      | Rhythmic<br>gymnasts<br>(n=40) | Volleyball<br>players<br>(n=46) | Non-<br>Athletes<br>(n=108) | p-value              |
|--------------------------------------|--------------------------------|---------------------------------|-----------------------------|----------------------|
| School category                      |                                |                                 |                             | –                    |
| High school                          | 23                             | 23                              | 47                          |                      |
| University / College                 | 17                             | 23                              | 61                          |                      |
| Age (years)                          | 17.5± 2.0                      | 17.9±2.0                        | 17.8±1.6                    | 0.488 <sup>†</sup>   |
| Athletic career (years)              | 11.2±3.0                       | 10.4±2.7                        | –                           | 0.206 <sup>‡</sup>   |
| Height (cm)                          | 157.3±4.6                      | 170.0±6.8 <sup>a</sup>          | 158.0±5.8 <sup>b</sup>      | < 0.001 <sup>Φ</sup> |
| Weight (kg)                          | 46.3±4.6                       | 60.8±5.9 <sup>a</sup>           | 49.8±6.7 <sup>a,b</sup>     | < 0.001 <sup>Φ</sup> |
| Body Mass Index (kg/m <sup>2</sup> ) | 18.7±1.7                       | 21.0±1.4 <sup>a</sup>           | 19.9±2.4 <sup>a,b</sup>     | < 0.001 <sup>Φ</sup> |

208 Values represent mean±SD.

209 <sup>†</sup> Kruskal-Wallis. <sup>‡</sup> Paired t-test. <sup>Φ</sup> One-way ANOVA.

210 <sup>a</sup>  $p < 0.05$  vs Rhythmic gymnasts, <sup>b</sup>  $p < 0.05$  vs Volleyball players, by Bonferroni post hoc  
211 test in each group.

212 Height and weight were self-reported.

213

## 214 **Prevalence of FAT**

215 Fig 1A shows the results of a comparison in the prevalence of FAT among the  
216 three female groups. The prevalence of LEA (rhythmic gymnasts [51.3%] vs. volleyball  
217 players [2.2%] vs. non-athletes [29.0%]) and MD (rhythmic gymnasts [64.1%] vs.

218 volleyball players [43.5%] vs. non-athletes [26.2%]) was significantly higher in the  
219 rhythmic gymnasts ( $p<0.001$ ). There was no significant difference in the rate of HSF  
220 among the three groups. Fig 1B shows the percentage of participants who met FAT  
221 criteria for each number of items. The percentage of participants who met FAT criteria in  
222 two items was significantly higher in the group of rhythmic gymnasts than in the other  
223 two groups (rhythmic gymnasts [43.6%] vs. volleyball players [13.0%] vs. non-athletes  
224 [16.8%],  $p<0.05$ ), and the percentage of participants who did not meet any FAT criteria  
225 was significantly lower in the group of rhythmic gymnasts than in the other two groups  
226 (rhythmic gymnasts [15.4%] vs. volleyball players [41.3%] vs. non-athletes [43.0%],  
227  $p<0.05$ ).

228

229 **Fig 1. The prevalence of athletes with FAT and the number of those at FAT-related**  
230 **risk**

231 A. LEA <85% of standard body weight (BMI=22 kg/m<sup>2</sup>); MD, including amenorrhea and  
232 menstrual irregularities; and HSF

233 <sup>a</sup> $p<0.05$  rhythmic gymnasts; <sup>b</sup> $p<0.05$  vs. volleyball, players, using a  $\chi^2$  test with  
234 Bonferroni correction in each group

235 B. The prevalence of each number at risk of the FAT

236 <sup>a</sup> $p<0.05$  vs rhythmic gymnasts, using a  $\chi^2$  test with Bonferroni correction in each group

237 Abbreviations: BMI, body mass index; FAT, female athlete triad; HSF, history of stress  
238 fracture; LEA, low energy availability; MD, menstrual dysfunction

239

240 **Intergroup comparisons for BI and eating behaviors**

241 Table 2 shows a comparison between BI and eating behaviors across the three  
 242 groups. Significant differences were observed in I-BI scores, with the rhythmic gymnasts  
 243 reporting a significantly lower score than those in the other two groups (rhythmic  
 244 gymnasts [2.8±0.9] vs. volleyball players [4.4±0.9] vs. non-athletes [3.8±1.2],  $p<0.001$ ).  
 245 Additionally, the BI distortion score was significantly higher in the rhythmic gymnasts  
 246 compared with the volleyball players (rhythmic gymnasts [0.7±1.2] vs. volleyball players  
 247 [-1.0±1.1] vs. non-athletes [0.2±1.4],  $p<0.001$ ), indicating that the rhythmic gymnasts  
 248 overestimated their body shape.

249

250 **Table 2. Body image and eating behaviors in rhythmic gymnasts, volleyball players,**  
 251 **and non-athletes.**

|                           | Rhythmic<br>gymnasts<br>( <i>n</i> =40) | Volleyball<br>players<br>( <i>n</i> =46) | Non-athletes<br>( <i>n</i> =108) | <i>p</i> -value      |
|---------------------------|-----------------------------------------|------------------------------------------|----------------------------------|----------------------|
| <b>Body image</b>         |                                         |                                          |                                  |                      |
| Current body image (C-BI) | 4.6±1.6                                 | 5.2±1.4                                  | 5.2±1.7                          | 0.136 <sup>†</sup>   |
| Ideal body image (I-BI)   | 2.8±0.9                                 | 4.4±0.9 <sup>a</sup>                     | 3.8±1.2 <sup>a,b</sup>           | < 0.001 <sup>†</sup> |
| Body image distortion*1   | 0.7±1.2                                 | -1.0±1.1 <sup>a</sup>                    | 0.2±1.4 <sup>b</sup>             | < 0.001 <sup>†</sup> |
| Underestimation           | 5 (12.5)                                | 30 (65.2) <sup>a</sup>                   | 32 (29.6) <sup>b</sup>           | < 0.001 <sup>§</sup> |
| No distortion             | 13 (32.5)                               | 13 (28.3)                                | 35 (32.4)                        |                      |
| Overestimation            | 22 (55.0)                               | 3 (6.5) <sup>a</sup>                     | 41 (38.0) <sup>b</sup>           |                      |
| Weighing frequency        |                                         |                                          |                                  | < 0.001 <sup>§</sup> |

|                                                                       |           |                        |                          |                      |
|-----------------------------------------------------------------------|-----------|------------------------|--------------------------|----------------------|
| Rarely                                                                | 3 (7.5)   | 3 (6.5)                | 50 (46.3) <sup>a,b</sup> |                      |
| 1–2 times per week                                                    | 1 (2.5)   | 21 (45.7) <sup>a</sup> | 27 (25.0) <sup>a</sup>   |                      |
| 3–4 times per week                                                    | 1 (2.5)   | 5 (10.9)               | 7 (6.5)                  |                      |
| 5 or more times per week                                              | 35 (87.5) | 17 (37.0) <sup>a</sup> | 24 (22.2) <sup>a</sup>   |                      |
| Weight-loss experience                                                |           |                        |                          | 0.005                |
| Never done it.                                                        | 12 (30.0) | 27 (58.7)              | 56 (51.9)                |                      |
| Not currently but did in the past.                                    | 7 (17.5)  | 15 (32.6)              | 27 (25.0)                |                      |
| I'm doing it now.                                                     | 21 (52.5) | 4 (8.7)                | 25 (23.1)                |                      |
| <b>Eating behaviors</b>                                               |           |                        |                          |                      |
| EAT-26 (total score)                                                  | 15.7±13.1 | 8.9±8.3 <sup>a</sup>   | 6.6±6.3 <sup>b</sup>     | < 0.001 <sup>†</sup> |
| Self-evaluation of dietary intake                                     |           |                        |                          | < 0.001 <sup>¶</sup> |
| Intake>Consumption (overeating)                                       | 11 (27.5) | 2 (4.3) <sup>a</sup>   | 44 (40.7) <sup>b</sup>   |                      |
| Intake<Consumption                                                    | 8 (20.0)  | 11 (23.9)              | 12 (11.1)                |                      |
| Intake=Consumption                                                    | 12 (30.0) | 26 (56.5) <sup>a</sup> | 36 (33.3) <sup>b</sup>   |                      |
| Unknown                                                               | 9 (22.5)  | 7 (15.2)               | 16 (14.8)                |                      |
| Skipping breakfast at least 3 times per week                          | 12 (30.0) | 7 (15.2)               | 13 (12.0) <sup>a</sup>   | 0.032 <sup>¶</sup>   |
| Eating dinner within 2 hours before bedtime at least 3 times per week | 19 (47.5) | 33 (71.7)              | 26 (24.1) <sup>a,b</sup> | < 0.001 <sup>¶</sup> |

|                          |          |          |          |                    |
|--------------------------|----------|----------|----------|--------------------|
| Frequency of staple food |          |          |          |                    |
| Rice (times/week)        | 11.1±6.4 | 15.2±8.9 | 13.0±6.5 | 0.058 <sup>†</sup> |
| Bread (times/week)       | 3.4±3.0  | 2.8±3.8  | 3.0±3.1  | 0.306 <sup>†</sup> |
| Noodle (times/week)      | 1.6±2.3  | 2.0±1.4  | 1.8±2.3  | 0.055 <sup>†</sup> |

252 Values represent mean±SD or n (%).

253 \*<sup>1</sup>, Body image distortion represents the difference between C-BI and Actual body  
 254 image ([C-BI]-[A-BI]).

255 <sup>†</sup> Kruskal-Wallis. <sup>¶</sup>  $\chi^2$  test. <sup>§</sup> Fisher's exact test.

256 <sup>a</sup>  $p<0.05$  vs Rhythmic gymnasts, <sup>b</sup>  $p<0.05$  vs Volleyball players, by Bonferroni post hoc  
 257 test in each group.

258 EAT; Eating Attitude Test

259

260 The proportion of participants who overestimated their body shape was significantly  
 261 higher in the rhythmic gymnasts (55.0%) than in the volleyball players (6.5%) ( $p<0.05$ )  
 262 and non-athletes (38.0%) ( $p<0.05$ ). The proportion of individuals who measured their  
 263 weight  $\geq 5$  times a week was significantly higher in the rhythmic gymnasts (87.5%) than  
 264 in the volleyball players (37.0%) and the non-athletes (22.2%) ( $p<0.001$ ). Furthermore,  
 265 the rhythmic gymnasts had a significantly higher percentage of individuals who had  
 266 experienced weight loss (52.5%) compared with the volleyball players (8.7%) and the  
 267 non-athletes (23.1%) ( $p=0.005$ ).

268 In terms of eating behaviors, the rhythmic gymnasts had a significantly higher  
 269 EAT-26 score than those in the other groups (rhythmic gymnasts [15.7±13.1] vs.  
 270 volleyball players [8.9±8.3] vs. non-athletes [6.6±6.3],  $p<0.001$ ). The percentage of  
 271 participants who self-evaluated their food intake as exceeding their consumption

272 (overeating) was significantly higher in the rhythmic gymnasts (27.5%) compared with  
273 the volleyball players (4.3%) ( $p<0.001$ ). The percentage of participants who skipped  
274 breakfast  $\geq 3$  times a week was also significantly higher in the rhythmic gymnasts (30.0%)  
275 compared with the non-athletes (12.0%) ( $p=0.032$ ). The percentage of participants who  
276 ate dinner 2 h before bedtime was significantly higher in both the rhythmic gymnasts  
277 (47.5%) and the volleyball players (71.7%) compared with the non-athletes (24.1%)  
278 ( $p<0.001$ ). The rhythmic gymnasts consumed rice less frequently than those in the other  
279 two groups, but this difference did not reach statistical significance ( $p=0.058$ ).

280

## 281 **FAT-related factors**

282 Table 3 presents the results of the multivariate logistic regression analysis in  
283 relation to each FAT component as a dependent variable. In a comparison between  
284 rhythmic gymnasts and volleyball players ( $n=86$ ), LEA was independently associated  
285 with being a rhythmic gymnast and with overestimation of body shape. MD was  
286 independently associated with high EAT-26 scores. No significant association was found  
287 for HSF. In a comparison between rhythmic gymnasts and non-athletes ( $n=148$ ), LEA  
288 was independently associated with being a rhythmic gymnast and with overestimation of  
289 body shape. MD was independently associated with being a rhythmic gymnast and with  
290 high EAT-26 scores. HSF was independently associated with high EAT-26 scores.

291

292 **Table 3. Risk factors associated with female athlete triad (FAT)**

|                                                                             | LEA                                   |                 | MD                                |                 | HSF                 |                 |
|-----------------------------------------------------------------------------|---------------------------------------|-----------------|-----------------------------------|-----------------|---------------------|-----------------|
|                                                                             | OR<br>(95%CI)                         | <i>p</i> -value | OR<br>(95%CI)                     | <i>p</i> -value | OR<br>(95%CI)       | <i>p</i> -value |
| Rhythmic gymnasts<br>and volleyball players<br>( <i>n</i> =86) <sup>†</sup> | ( <i>n</i> =86)                       |                 | ( <i>n</i> =84)                   |                 | ( <i>n</i> =86)     |                 |
| Rhythmic gymnasts<br>(vs. volleyball players)                               | <b>174.41</b><br><b>(6.38-927.83)</b> | <b>0.003</b>    | 1.09<br>(0.31-3.82)               | 0.894           | 0.98<br>(0.27-3.57) | 0.981           |
| Body image distortion <sup>ϕ</sup>                                          | <b>4.34</b><br><b>(1.60-11.80)</b>    | <b>0.004</b>    | 1.36<br>(0.86-2.14)               | 0.190           | 1.00<br>(0.65-1.53) | 0.997           |
| EAT-26 (total score) <sup>ϕ</sup>                                           | 0.93<br>(0.92-1.10)                   | 0.931           | <b>1.07</b><br><b>(1.01-1.14)</b> | <b>0.024</b>    | 1.04<br>(0.99-1.09) | 0.087           |
|                                                                             |                                       |                 |                                   |                 |                     |                 |
| Rhythmic gymnasts                                                           | ( <i>n</i> =148)                      |                 | ( <i>n</i> =146)                  |                 | ( <i>n</i> =148)    |                 |



|                                               |                                    |                  |                                   |              |                                   |              |
|-----------------------------------------------|------------------------------------|------------------|-----------------------------------|--------------|-----------------------------------|--------------|
| and non-Athlete ( <i>n</i> =148) <sup>‡</sup> |                                    |                  |                                   |              |                                   |              |
| Rhythmic gymnasts<br>(vs. non-athlete)        | <b>3.95</b><br><b>(1.02-15.36)</b> | <b>0.047</b>     | <b>3.18</b><br><b>(1.36-7.56)</b> | <b>0.009</b> | 1.21<br>(0.46-3.17)               | 0.698        |
| Body image distortion <sup>Φ</sup>            | <b>7.45</b><br><b>(3.63-15.30)</b> | <b>&lt;0.001</b> | 1.24<br>(0.94-1.66)               | 0.134        | 0.81<br>(0.60-1.10)               | 0.179        |
| EAT-26 (total score) <sup>Φ</sup>             | 1.05<br>(0.97-1.14)                | 0.210            | <b>1.06</b><br><b>(1.01-1.11)</b> | <b>0.024</b> | <b>1.04</b><br><b>(1.00-1.09)</b> | <b>0.047</b> |

293 † Adjusted for age and athletic career, ‡ Adjusted for age, Φ Data continuous

294 LEA, low energy availability; MD, menstrual dysfunction; HSF, history of stress fractures; OR, odds ratio; 95% CI,

295 EAT; Eating Attitude Test

296

## 297 **Discussion**

298           The results of this study showed that female rhythmic gymnasts were thinner  
299 than both female volleyball players and non-athletes and exhibited a higher prevalence of  
300 each FAT component-related sign, particularly LEA and MD. Rhythmic gymnasts,  
301 similar to non-athletes, reported a greater overestimation of their own body shape  
302 compared with female volleyball players. Furthermore, logistic regression analysis  
303 revealed that being a rhythmic gymnast, overestimating body shape, and engaging in  
304 eating disorder-related eating behaviors were independently associated with LEA or MD.

305           We identified a significantly higher prevalence of each FAT component,  
306 especially LEA and MD, among the rhythmic gymnasts. Approximately 50% of the  
307 rhythmic gymnasts met  $\geq 2$  FAT criteria. This finding is consistent with findings reported  
308 elsewhere that indicate a higher prevalence of LEA (BMI  $< 17.5$  kg/m<sup>2</sup>) in Japanese  
309 university athletes of aesthetic sports (7.2%), which exceeds that of other sports [14] and  
310 a greater proportion meeting multiple FAT criteria compared with athletes of other sports  
311 [9]. The rigorous training and aesthetic demands of rhythmic gymnastics lead to increased  
312 energy expenditure, while the need to maintain a specific BI often leads to insufficient  
313 energy intake, thereby resulting in LEA.

314           The association between LEA and MD has been previously reported [5,17,18].  
315 Irregularities and abnormalities in the menstrual cycle typically occur when energy  
316 expenditure from exercise exceeds energy intake over a certain period (relatively long),  
317 which is consistent with our findings. However, no significant difference in the  
318 prevalence of HSF was observed. Despite the high-impact nature of rhythmic gymnastics,  
319 which places substantial stress on joints and bones, it is possible that athletes of such

320 sports have higher bone density compared with those in non-impact sports such as  
321 swimming or non-athletes [19,20]. Additionally, the effects on bone may manifest later  
322 than concerns such as menstrual abnormalities [21]. Measuring bone density with high-  
323 precision equipment such as dual-energy x-ray absorptiometry may be necessary to detect  
324 these issues. Furthermore, HSF is influenced by factors such as calcium and vitamin D  
325 intake [22] and exercise intensity [9], suggesting that further research is needed to account  
326 for these variables. With regard to BI, >50% of the rhythmic gymnasts in this study  
327 overestimated their body shape, which was a significantly higher proportion among  
328 volleyball players. A previous study reported that Japanese non-athlete females also tend  
329 to overestimate their body shape, particularly at a younger age, and that a desire to lose  
330 weight among thin women (BMI <18.5 kg/m<sup>2</sup>) is associated with distorted BI perceptions  
331 [7]. Our study findings suggest that, similar to non-athlete women, rhythmic gymnasts'  
332 overestimation of their body shape may exacerbate their desire to lose weight.  
333 Additionally, rhythmic gymnasts had a lower BMI compared with volleyball players and  
334 non-athletes, and their ideal body shape was notably slender. They also reported more  
335 frequent weight measurement and the highest proportion of individuals currently dieting,  
336 with >50% engaged in weight loss efforts. These results align with the findings of Bruin  
337 et al. [23] that, despite having a lower BMI than the general population, female athletes  
338 of aesthetic sports often have an increased desire to lose weight and engage in dieting  
339 more frequently.

340           Distorted BI, body dissatisfaction, and weight concerns are well-documented  
341 risk factors for eating disorder. BI disturbances have been linked to eating disorder and  
342 weight loss behaviors in athletes [24,25] and, among athletes of aesthetic spots, the desire  
343 to present a "perfect" body shape is known to exacerbate tendencies toward eating

344 disorder [26]. In this study, rhythmic gymnasts exhibited higher EAT-26 scores, eating  
345 disorder, and reported a higher frequency of skipping breakfast compared to the other two  
346 groups, indicating disordered eating patterns. These findings suggest that the nature of  
347 rhythmic gymnastics contributes to a belief among athletes that weight loss is necessary  
348 for performance enhancement. This distorted BI perception may further intensify their  
349 weight loss efforts, leading to inadequate eating behaviors such as food restriction.

350 Factors associated with the prevalence of each FAT components include  
351 participation in rhythmic gymnasts, distorted BI, and eating behaviors linked to eating  
352 disorder. Previous studies have identified inappropriate eating behaviors as risk factors  
353 for FAT, noting that such behaviors can alter hormone levels, affect the reproductive  
354 system, and ultimately disrupt the menstrual cycle, which may negatively affect bone  
355 health if not corrected [27]. This study similarly highlights that distorted BI contributes  
356 to LEA, a primary factor in FAT. The results imply that rhythmic gymnasts' desire for a  
357 lean body to enhance competitive performance, coupled with an overestimation of their  
358 body shape, may precipitate the development of FAT. These findings underscore the need  
359 for targeted support for young female athletes in Japan, particularly rhythmic gymnasts,  
360 to promote healthy BI and eating behaviors to prevent FAT.

361 This study had several limitations. We relied on an online survey in which  
362 participants reported their menstrual status and HSF without formal medical diagnosis. A  
363 detailed dietary survey was not conducted, meaning that energy availability was not  
364 quantitatively assessed. Despite these limitations, to the best of our knowledge, this study  
365 is the first to examine the prevalence of FAT and its association with BI among young  
366 female athletes involved in rhythmic gymnastics and volleyball and among non-athletes.

367

## 368 **Conclusion**

369           The prevalence of FAT (at least one or more components) was approximately  
370 1.5 times higher among rhythmic gymnasts than among volleyball players and non-  
371 athletes. Logistic regression analysis indicated that FAT-associated factors include  
372 participation in rhythmic gymnasts, distorted BI, and eating behaviors linked to eating  
373 disorder. These findings suggest that future support for appropriate body image and eating  
374 behaviors among Japanese rhythmic gymnasts is required.

375

## 376 **Acknowledgments**

377 None.

378

## 379 **References**

- 380 1. Yamashita S. Historical development of support programs for female athletes in  
381 Japan. *J High Performance Sport*. 2021;8: 35–48.
- 382 2. Nattiv A, Loucks AB, Manore MM, Sanborn CF, Sundgot-Borgen J, Warren MP.  
383 American College of Sports Medicine position stand. The female athlete triad. *Med  
384 Sci Sports Exerc*. 2007;39: 1867–1882.
- 385 3. Mountjoy M, Sundgot-Borgen J, Burke L, Carter S, Constantini N, Lebrun C, et al.  
386 The IOC consensus statement: beyond the female athlete triad -- relative energy  
387 deficiency in sport (RED-S). *Br J Sports Med*. 2014;48:491–497.
- 388 4. Population Registration of Japan Gymnastics Association 2023. [(accessed on 6 July  
389 2024)] Available online: <https://www.jpn-gym.or.jp/wp->

- 390 content/uploads/2024/05/b0aeba97c3f9db0959c287b5366c4089.pdf
- 391 5. Nose S, Dohi M, Manba S, Akimori K, Mezaki N, Komatsu Y, et al. Investigation  
392 of amenorrhea and stress fractures in elite female athletes. *J Clin Sports Med*.  
393 2014;22: 67–74 [in Japanese].
- 394 6. Sundgot-Borgen J. Prevalence of eating disorders in elite female athletes. *Med Sci*  
395 *Sports Exerc*. 1994;26: 414–419.
- 396 7. Yumen Y, Takayama Y, Yoshitani K, Okuzono M, Hanzawa F, Sakane N, et al.  
397 Characteristics of body image among Japanese adults based on actual body shape,  
398 sex, and age, and factors distorting intentionality toward appropriate weight. *J Jpn*  
399 *Soc Study Obes*. (in press) [in Japanese].
- 400 8. De Souza MJ, Nattiv A, Joy E, Misra M, Williams NI, Mallinson RJ, et al. 2014  
401 female athlete triad coalition consensus statement on treatment and return to play of  
402 the female athlete triad: 1st International Conference held in San Francisco,  
403 California, May 2012 and 2nd International Conference held in Indianapolis, Indiana,  
404 May 2013. *Br J Sports Med. Expert Panel*. 2014;48: 289.
- 405 9. Sawai A, Mathis BJ, Natsui H, Zaboronok A, Mitsuhashi R, Warashina Y, et al. Risk  
406 of female athlete triad development in Japanese collegiate athletes is related to sport  
407 type and competitive level. *Int J Womens Health*. 2018;10: 671–687.
- 408 10. Yumen Y, Takayama Y, Suzuki A, Wada Y, Sakane N, Nagai N. Development of  
409 the Japanese version of Body Image Scale, and assessment of its reliability and  
410 validity. *J Jpn Soc Study Obes*. 2021;27: 140–148 [in Japanese].
- 411 11. Takayama Y, Yumen Y, Kitajima T, Honda N, Sakane N, Fukui M, et al.  
412 Association of low body mass index with body size distortion in female patients with

- 413 nontuberculous mycobacterial lung disease. *PLoS One*. 2023;22;18: e0290277.
- 414 12. Uotani N, Iwai K, Yoshoda S, Morimoto M, Miyawaki T. Relationship between  
415 body image distortion and body mass index and food intake in the young and middle-  
416 aged Japanese women. *J Jp Soc Psychosom Obstet Gynecol*. 2020;25: 11–18 [in  
417 Japanese].
- 418 13. Garner DM, Olmsted MP, Bohr Y, Garfinkel PE. The eating attitudes test:  
419 psychometric features and clinical correlates. *Psychol Med*. 1982;12: 871–878.
- 420 14. Mukai T, Crago M, Shisslak CM. Eating attitudes and weight preoccupation among  
421 female high school students in Japan. *J Child Psychol Psychiatry*. 1994;35: 677–688.
- 422 15. Ishizu T, Torii S, Taguchi M. Habitual dietary status and stress fracture risk among  
423 Japanese female collegiate athletes. *J Am Nutr Assoc*. 2022;41: 481–488.
- 424 16. McDonald AH, Pritchard M, McGuire MK. Self-reported eating disorder risk in  
425 lean and non-lean NCAA Collegiate Athletes. *Eat Weight Disord*. 2020;25: 745–750.
- 426 17. Gibbs JC, Williams NI, De Souza MJ. Prevalence of individual and combined  
427 components of the female athlete triad. *Med Sci Sports Exerc*. 2013;45: 985–996.
- 428 18. Hoch AZ, Pajewski NM, Moraski L, Carrera GF, Wilson CR, Hoffmann RG, et al.  
429 Prevalence of the female athlete triad in high school athletes and sedentary students.  
430 *Clin J Sport Med*. 2009;19: 421–428.
- 431 19. Tobias JH, Steer CD, Mattocks CG, Riddoch C, Ness AR. Habitual levels of  
432 physical activity influence bone mass in 11-year-old children from the United  
433 Kingdom : findings from a large population-based cohort. *J Bone Miner Res*.  
434 2007;22: 101–109.
- 435 20. Vösoberg K, Tillmann V, Tamm AL, Maasalu K, Jürimäe J. Bone mineralization in  
436 rhythmic gymnasts entering puberty: Associations with jumping performance and

- 437 body composition variables. *J Sports Sci Med.* 2017;16: 99–104.
- 438 21. Nose-Ogura S, Yoshino O, Dohi M, Kigawa M, Harada M, Kawahara T, et al. Low  
439 bone mineral density in elite female athletes with a history of secondary amenorrhea  
440 in their teens. *Clin J Sport Med.* 2020;30: 245–250.
- 441 22. Nieves JW, Melsop K, Curtis M, Kelsey JL, Bachrach LK, Greendale G, et al.  
442 Nutritional factors that influence change in bone density and stress fracture risk  
443 among young female cross-country runners. *PM R.* 2010;2: 740–750.
- 444 23. Bruin PA, Oudejans DR, Bakker CF. Dieting and body image in aesthetic sports: A  
445 comparison of Dutch female gymnasts and non-aesthetic sport participants. *Psychol*  
446 *Sport Exerc.* 2007;8: 507–520.
- 447 24. Berry TR, Howe BL. Risk factors for disordered eating in female university athletes.  
448 *J Sport Behav.* 2000;23: 207–218.
- 449 25. Fogelholm M, Hiilloskorpi H. Weight and diet concerns in Finnish female and male  
450 athletes. *Med Sci Sports Exerc.* 1999;31: 229–235.
- 451 26. Paixão C, Oliveira S, Ferreira C. A comprehensive model of disordered eating  
452 among aesthetic athletic girls: Exploring the role of body image-related cognitive  
453 fusion and perfectionistic self- presentation. *Curr Psychol.* 2021;40: 5727–5734.
- 454 27. Nose-Ogura S, Yoshino O, Dohi M, Kigawa M, Harada M, Hiraike O, et al. Risk  
455 factors of stress fractures due to the female athlete triad: Differences in teens and  
456 twenties. *Scand J Med Sci Sports.* 2019;29: 1501–1510.



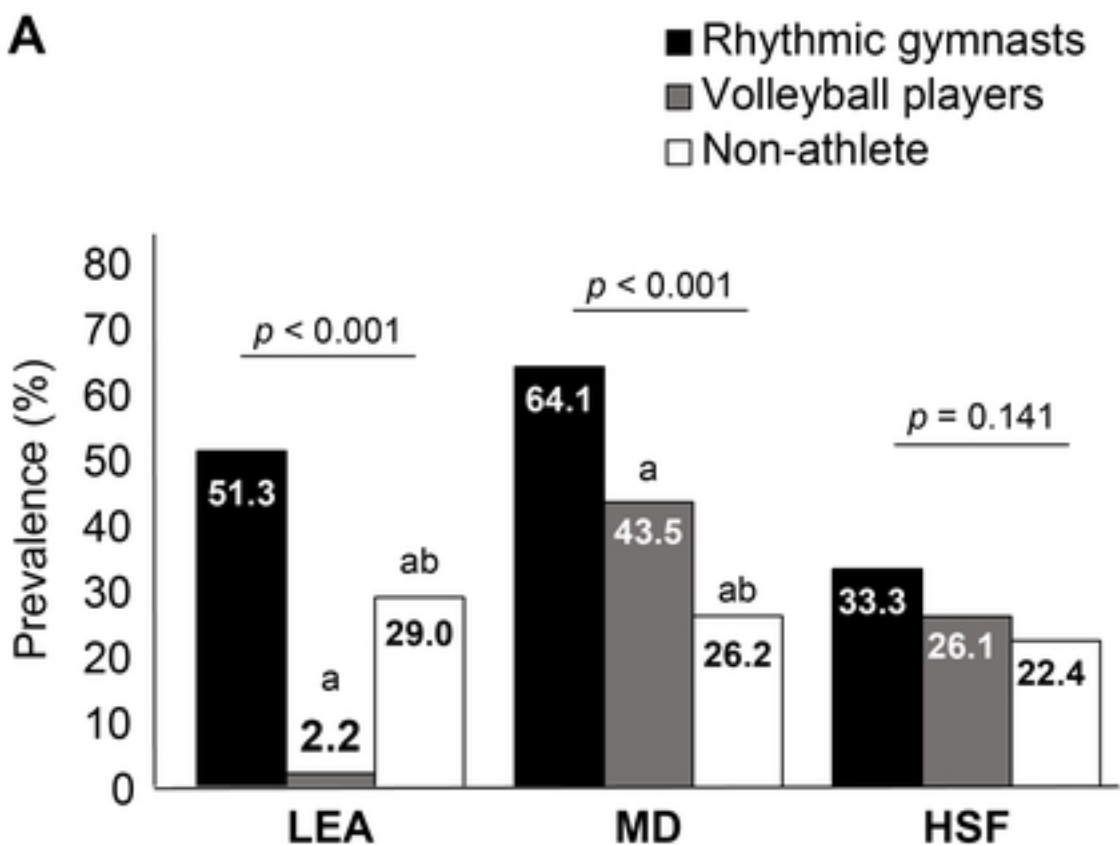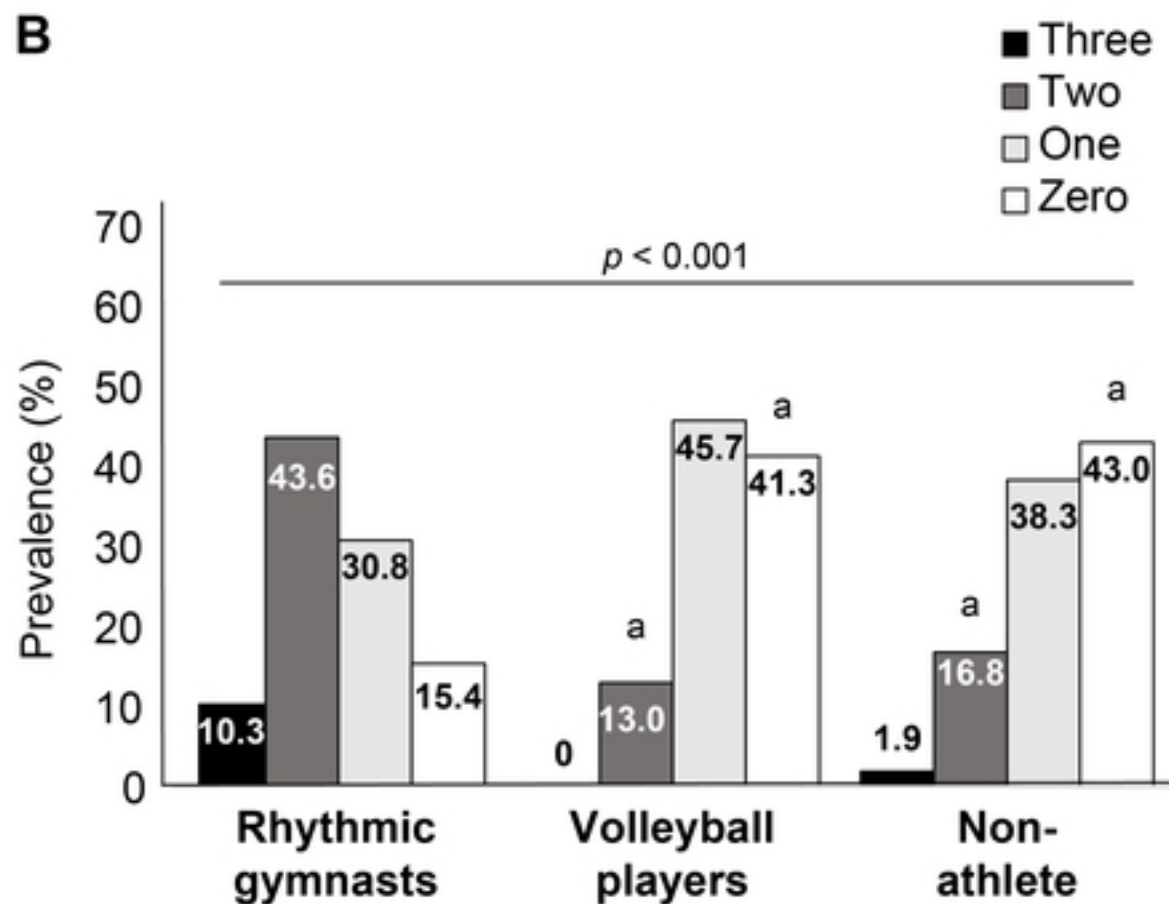

Figure 1
